# Supplementary material for: Co3O4 Nanoparticles Uniformly Dispersed in Rational Porous Carbon Nano-Boxes for Significantly Enhanced Electrocatalytic Detection of H2O2 Released from Living Cells
Source: MDPI journal article supplement (doi:10.3390/ijms23073799), 2022-03-30
Supplement: s1 [file s1]

## Supporting Information

### **Co<sub>3</sub>O<sub>4</sub> nanoparticles uniformly dispersed in rational porous carbon nano-boxes for significantly enhanced electrocatalytic detection of H<sub>2</sub>O<sub>2</sub> released from living cells**

*Lulu Xiong<sup>a</sup>, Yuanyuan Zhang<sup>a</sup>, Shiming Wu<sup>a</sup>, Feng Chen<sup>a</sup>, Lingli Lei<sup>a</sup>, Ling Yu<sup>a\*</sup> and Changming Li<sup>a,b,c\*</sup>*

a. Key Laboratory of Luminescence Analysis and Molecular Sensing, Ministry of Education, Institute for Clean Energy and Advanced Materials, School of Materials and Energy, Southwest University, Chongqing 400715, P.R. China

b. Institute for Materials Science and Devices, School of Material Science and Engineering, Suzhou University of Science and Technology, Suzhou 215011, P.R. China

c. Institute of Advanced Cross-field Science and College of Life Science, Qingdao University, Qingdao, 266071, China

\* Corresponding author: [lingyu12@swu.edu.cn](mailto:lingyu12@swu.edu.cn) (L. Yu), [ecmli@swu.edu.cn](mailto:ecmli@swu.edu.cn) (C.M. Li)

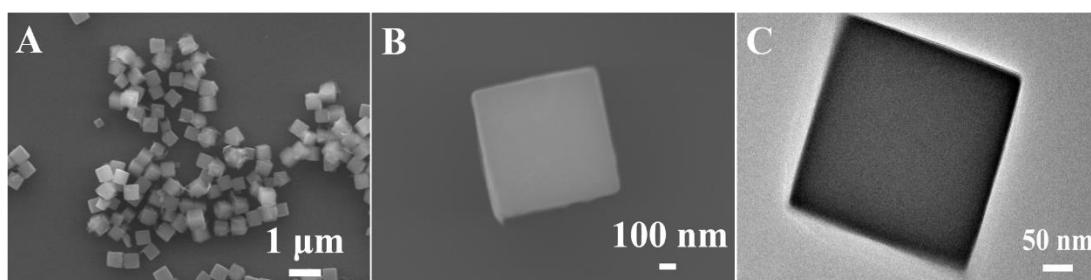

**Figure S1** (A), (B) FESEM images of ZIF-67; (C) TEM images of ZIF-67.

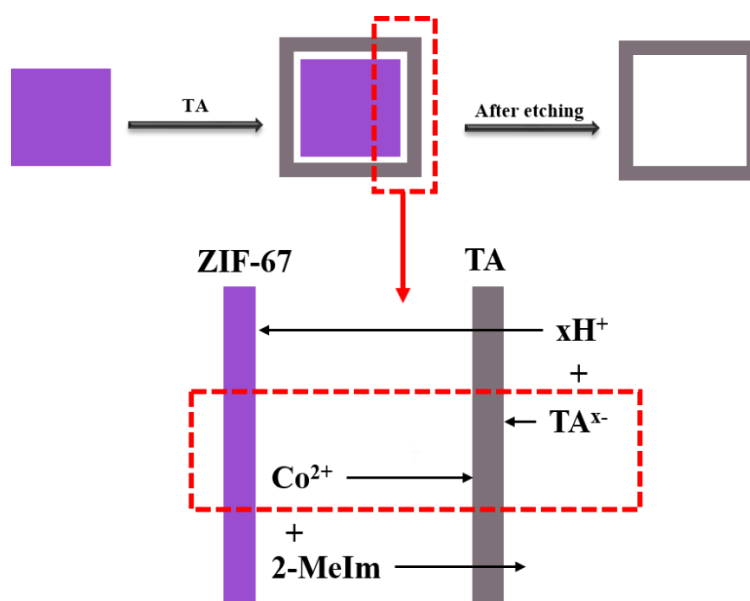

**Figure S2** Schematic illustrations of the tannic acid (TA) based ZIF-67 etching.

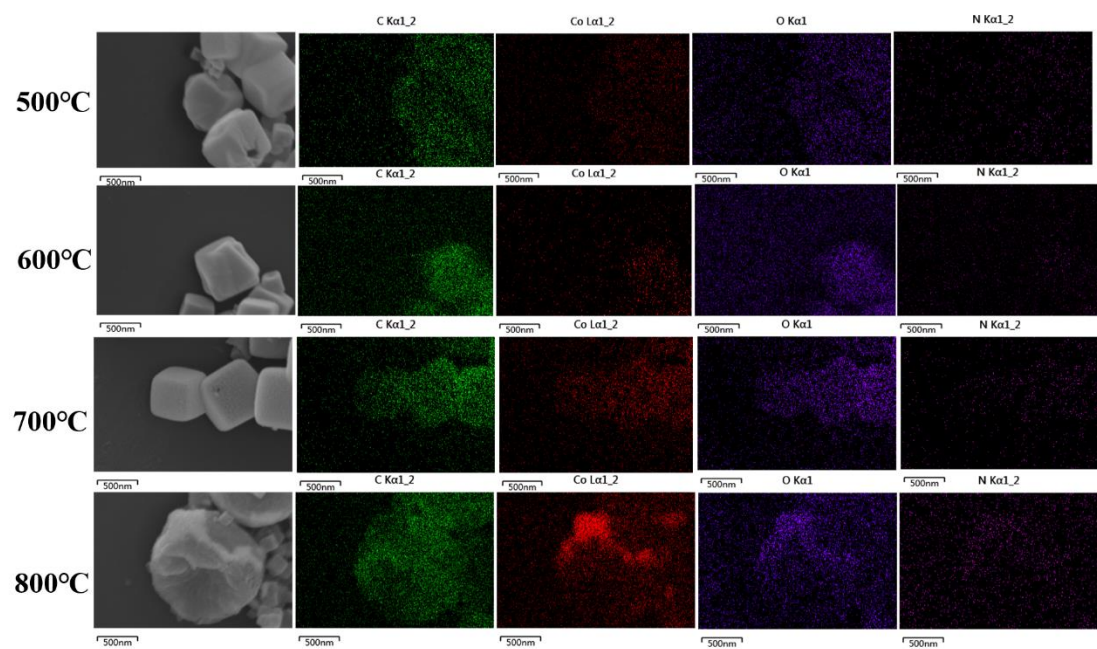

**Figure S3.** FESEM and elemental mapping images of  $\text{C}_3\text{O}_4@\text{CNBs}$  synthesized at different temperature: C (green), Co (red), O (purple) and N (blue).

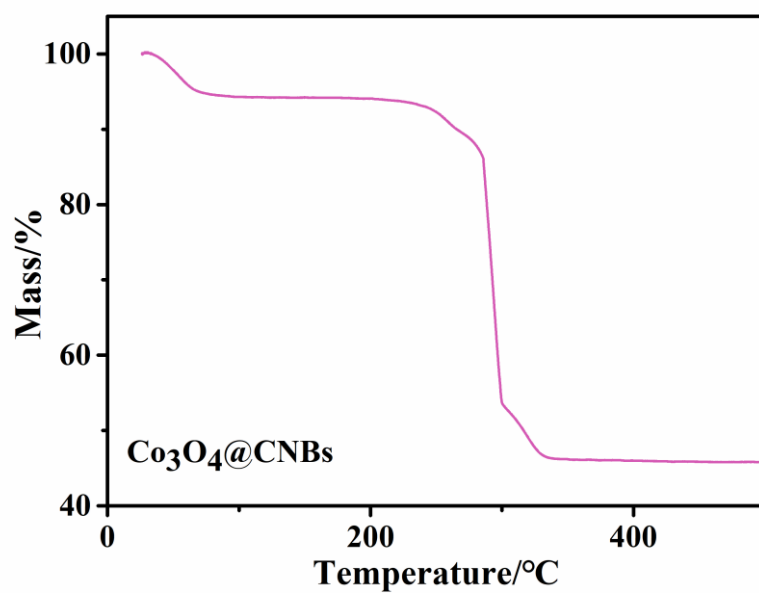

**Figure S4** A TGA curve of  $\text{C}_3\text{O}_4@\text{CNBs}$  in flowing air.

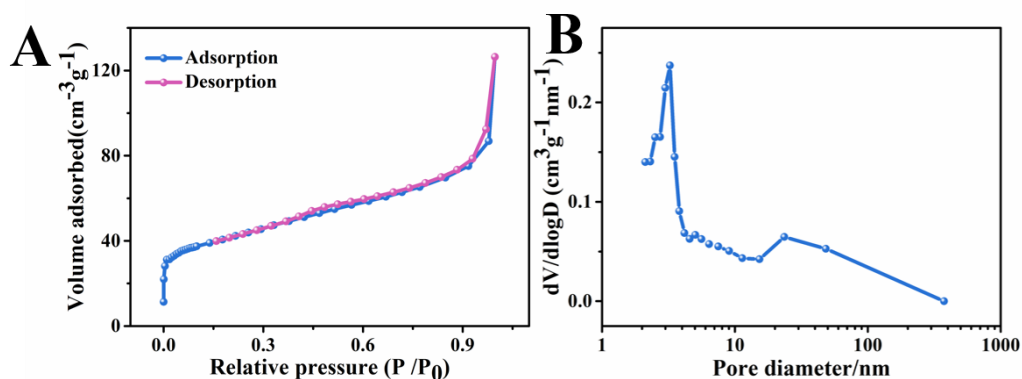

**Figure S5** (A) N<sub>2</sub> adsorption-desorption isotherms and (B) pore-size distribution plot of Co<sub>3</sub>O<sub>4</sub>@C at 700 °C.

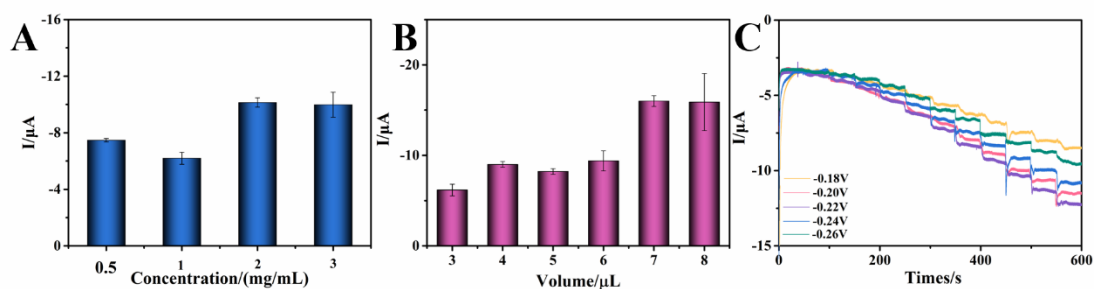

**Figure S6** (A) Optimization study of Co<sub>3</sub>O<sub>4</sub>@CNBs concentration on the GCE; (B) Optimization study of volume of Co<sub>3</sub>O<sub>4</sub>@CNBs deposited on the GCE; (C) The amperometric i-t curves of Co<sub>3</sub>O<sub>4</sub>@CNBs/GCE for the successive additions of H<sub>2</sub>O<sub>2</sub> at different operating voltages.

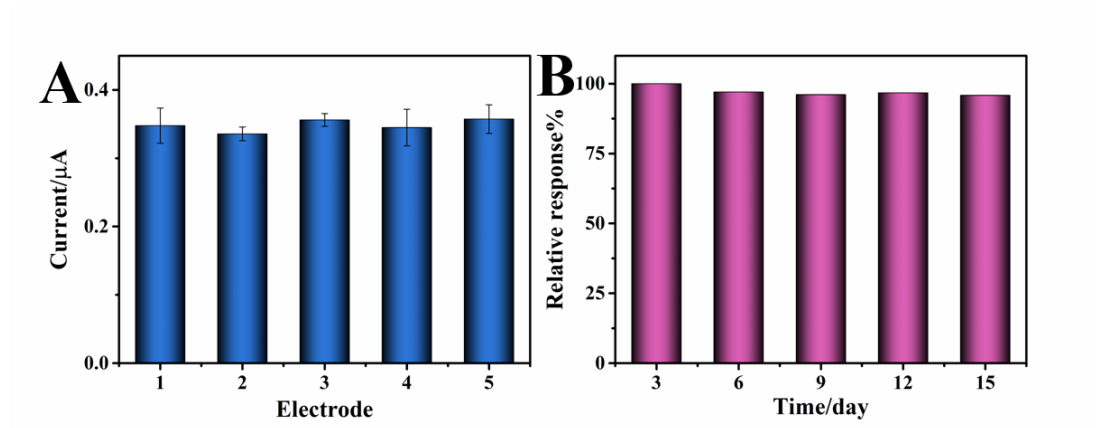

**Figure S7** (A) Reproducibility between different Co<sub>3</sub>O<sub>4</sub>@CNBs/GCE; (B) Long-term storage stability of Co<sub>3</sub>O<sub>4</sub>@CNBs/GCE.

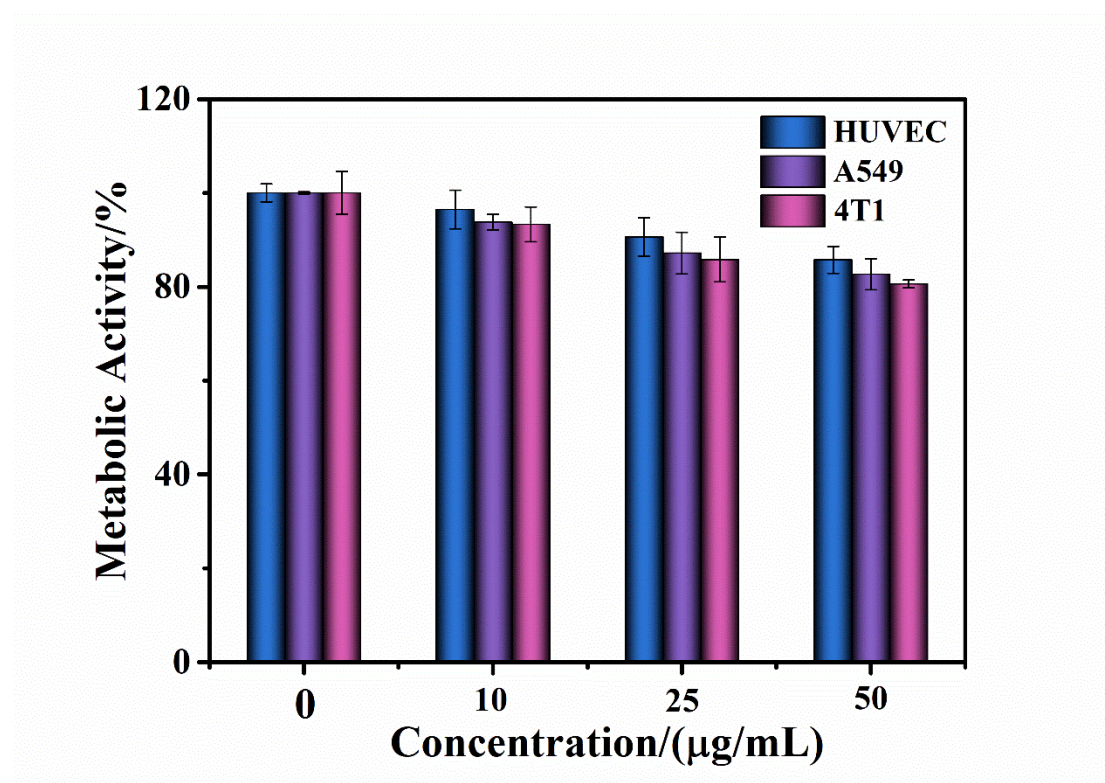

**Figure S8.** The cytotoxicity of Co<sub>3</sub>O<sub>4</sub>@CNBs on HUVEC, A549 and 4T1 cells characterized by cell metabolic activity.

**Table S1.** Recovery rate of the Co<sub>3</sub>O<sub>4</sub>@CNBs sensor in H<sub>2</sub>O<sub>2</sub> testing.

| Added<br>Concentration (μM) | Mean Found(μM) | Mean recovery% |
|-----------------------------|----------------|----------------|
| 0.16                        | 0.153          | 95.62          |
| 0.19                        | 0.201          | 105.78         |
| 0.26                        | 0.268          | 103.07         |
